# Supplementary material for: The Differential Association between Muscle Strength and Diabetes Mellitus According to the Presence or Absence of Obesity
Source: PubMed Central journal article supplement — J Obes Metab Syndr. 2019 Mar 30;28(1):46–52. doi: 10.7570/jomes.2019.28.1.46 (PMC6484941; doi:10.7570/jomes.2019.28.1.46), 2019-03-30
Supplement: jomes-28-046_Supple.pdf [file jomes-28-046_Supple.pdf]

**Supplementary Table 1.** Handgrip strength (kg) in each age group

| Age (yr)            | Male         |                  |                  | Female       |                  |                  |
|---------------------|--------------|------------------|------------------|--------------|------------------|------------------|
|                     | Unweighted N | Dominant arm     | Nondominant arm  | Unweighted N | Dominant arm     | Nondominant arm  |
| 30–39               | 1,124        | 43.6 (39.1–48.3) | 41.6 (37.0–46.1) | 1,493        | 25.4 (22.2–28.3) | 23.9 (21.0–26.9) |
| 40–49               | 1,242        | 42.5 (37.9–46.8) | 40.7 (36.7–45.0) | 1,613        | 25.1 (21.9–28.3) | 23.8 (20.9–26.7) |
| 50–59               | 1,321        | 39.7 (35.2–43.8) | 38.3 (33.9–42.1) | 1,676        | 24.4 (21.2–26.9) | 22.7 (19.9–25.6) |
| 60–69               | 1,261        | 36.5 (32.2–40.4) | 35.1 (31.0–38.9) | 1,420        | 22.3 (18.9–25.3) | 20.9 (18.1–23.7) |
| 70–79               | 912          | 31.4 (27.0–35.6) | 30.3 (26.4–34.2) | 1,087        | 18.8 (15.6–22.0) | 18.0 (14.9–20.9) |
| <i>P</i> for trend* |              | <0.001           | <0.001           |              | <0.001           | <0.001           |

Values are presented as median (interquartile range).

\*From logistic regression.

**Supplementary Table 2.** Behavior of the risk of obesity, diabetes mellitus, and metabolic syndrome as the Q of handgrip strength increased

| Variable           | OR (95% CI)*        | <i>P</i> |
|--------------------|---------------------|----------|
| <b>Male</b>        |                     |          |
| Obesity            | 1.300 (1.231–1.373) | <0.001   |
| Diabetes mellitus  | 0.926 (0.862–0.996) | 0.039    |
| Metabolic syndrome | 1.106 (1.046–1.169) | <0.001   |
| <b>Female</b>      |                     |          |
| Obesity            | 1.122 (1.062–1.185) | <0.001   |
| Diabetes mellitus  | 0.917 (0.854–0.986) | 0.019    |
| Metabolic syndrome | 1.078 (1.021–1.138) | 0.007    |

\*Unadjusted odds ratio per one Q of handgrip strength.

Q, quartile; OR, odds ratio; CI, confidence interval.

**Supplementary Table 3.** The association between low muscle strength and diabetes according to age

| Variable                   | Multivariable regression analysis* |          |
|----------------------------|------------------------------------|----------|
|                            | OR (95% CI)                        | <i>P</i> |
| <b>30–49 yr</b>            |                                    |          |
| Low muscle strength        | 1.524 (1.083–2.143)                | 0.016    |
| Family history of diabetes | 2.625 (1.935–3.561)                | <0.001   |
| Abdominal obesity          | 3.137 (2.277–4.322)                | <0.001   |
| Hypertriglyceridemia       | 2.032 (1.438–2.872)                | <0.001   |
| Low HDL cholesterolemia    | 1.472 (1.061–2.041)                | 0.021    |
| Hypertension               | 1.998 (1.418–2.815)                | <0.001   |
| Age                        | 1.099 (1.068–1.131)                | <0.001   |
| Sex (female)               | 0.862 (0.623–1.192)                | 0.368    |
| <b>50–69 yr</b>            |                                    |          |
| Low muscle strength        | 1.250 (1.021–1.531)                | 0.031    |
| Family history of diabetes | 3.160 (2.614–3.820)                | <0.001   |
| Abdominal obesity          | 1.660 (1.379–1.999)                | <0.001   |
| Hypertriglyceridemia       | 1.854 (1.532–2.244)                | <0.001   |
| Low HDL cholesterolemia    | 1.780 (1.453–2.181)                | <0.001   |
| Hypertension               | 1.519 (1.264–1.826)                | <0.001   |
| Age                        | 1.071 (1.054–1.088)                | <0.001   |
| Sex (female)               | 0.546 (0.455–0.663)                | <0.001   |
| <b>70–79 yr</b>            |                                    |          |
| Low muscle strength        | 1.423 (1.050–1.929)                | 0.023    |
| Family history of diabetes | 3.194 (2.268–4.497)                | <0.001   |
| Abdominal obesity          | 1.305 (1.005–1.693)                | 0.045    |
| Hypertriglyceridemia       | 1.315 (0.976–1.772)                | 0.072    |
| Low HDL cholesterolemia    | 1.183 (0.869–1.609)                | 0.284    |
| Hypertension               | 1.692 (1.294–2.211)                | <0.001   |
| Age                        | 1.023 (0.973–1.076)                | 0.370    |
| Sex (female)               | 0.845 (0.637–1.121)                | 0.243    |

\*Age, sex, muscle strength, family history of diabetes, abdominal obesity, hypertriglyceridemia, low HDL cholesterolemia, and hypertension were included in the multivariable regression analysis.

OR, odds ratio; CI, confidence interval; HDL, high-density lipoprotein.

**Supplementary Table 4.** OR for diabetes mellitus in the stratified analysis according to BMI in those without obesity

| Variable                   | BMI < 23 kg/m <sup>2</sup> (unweighted n = 5,986) |          | BMI 23–24.9 kg/m <sup>2</sup> (unweighted n = 3,566) |          |
|----------------------------|---------------------------------------------------|----------|------------------------------------------------------|----------|
|                            | OR (95% CI)*                                      | <i>P</i> | OR (95% CI)*                                         | <i>P</i> |
| Low muscle strength        | 1.910 (1.434–2.543)                               | <0.001   | 1.172 (0.867–1.586)                                  | 0.301    |
| Family history of diabetes | 3.677 (2.658–5.088)                               | <0.001   | 3.676 (2.770–4.879)                                  | <0.001   |
| Abdominal obesity          | 2.028 (1.112–3.699)                               | 0.021    | 1.094 (0.792–1.512)                                  | 0.585    |
| Hypertriglyceridemia       | 1.734 (1.252–2.401)                               | 0.001    | 2.400 (1.796–3.207)                                  | <0.001   |
| Low HDL cholesterolemia    | 1.607 (1.174–2.201)                               | 0.003    | 1.416 (1.046–1.919)                                  | 0.025    |
| Hypertension               | 1.571 (1.177–2.097)                               | 0.002    | 1.625 (1.214–2.177)                                  | 0.001    |
| Age                        | 1.081 (1.071–1.091)                               | <0.001   | 1.075 (1.063–1.088)                                  | <0.001   |
| Sex (female)               | 0.434 (0.321–0.586)                               | <0.001   | 0.802 (0.598–1.076)                                  | 0.140    |

\*Age, sex, muscle strength, family history of diabetes, abdominal obesity, hypertriglyceridemia, low HDL cholesterolemia, and hypertension were included in the multivariable regression analysis.

BMI, body mass index; OR, odds ratio; CI, confidence interval; HDL, high-density lipoprotein.
